# Supplementary material for: Validating Flow Cytometry as a Method for Quantifying Bdellovibrio Predatory Bacteria and Its Prey for Microbial Ecology
Source: PubMed Central journal article supplement (PMC8865432; doi:10.1128/spectrum.01033-21), 2022-02-23
Supplement: spectrum01033-21_supp_1_seq5.pdf [file spectrum01033-21_supp_1_seq5.pdf]

**Table s1-** The mean and standard deviation for optical density (600nm) values from three observations and the Box-Cox transformations ( $\lambda=-0.6$ ).

| <b>OD(600nm)</b> | <b>Standard deviation</b> | <b>Box-Cox transformed OD</b> |
|------------------|---------------------------|-------------------------------|
| 0.00233333       | 0.00057735                | -61.637923                    |
| 0.00266667       | 0.00057735                | -57.607402                    |
| 0.00266667       | 0.00057735                | -56.801539                    |
| 0.00266667       | 0.00057735                | -56.713789                    |
| 0.00666667       | 0.00057735                | -32.227299                    |
| 0.007            | 0                         | -31.051573                    |
| 0.008            | 0                         | -28.532486                    |
| 0.052            | 0.002                     | -8.156392                     |
| 0.11             | 0.01                      | -4.599662                     |
